# Supplementary material
Source: PubMed Central journal article supplement (PMC2682008)
Supplement: supp_29_11_3186__1.pdf [file supp_29_11_3186__1.pdf]

**Table S2: Transcripts down-regulated greater than 2-fold in Dppa4-deficient ES cells with established or proposed functions in gametogenesis.**

| Gene Symbol | Annotation                                                                                                                                                                                                                                                          | Ref.         |
|-------------|---------------------------------------------------------------------------------------------------------------------------------------------------------------------------------------------------------------------------------------------------------------------|--------------|
| Syce1       | „Synaptonemal central element 1“: structural component of meiotic synaptonemal complex                                                                                                                                                                              | (4)          |
| Mael        | „Maelstrom“: component of <i>nuage</i> (germ-cell-specific organelle); essential for spermatogenesis                                                                                                                                                                | (20)         |
| Sohlh2      | „Spermatogenesis-and-oogenesis-helix-loop-helix-2“: germ-cell-specific transcription factor; essential for male and female gametogenesis                                                                                                                            | (3, 7, 23)   |
| Dazl        | „Deleted in azoospermia-like“: RNA-binding protein; essential for gametogenesis in males and females                                                                                                                                                                | (12, 19, 25) |
| Spesp1      | „Sperm equatorial segment protein 1“: specific component of the sperm acrosome involved in sperm/egg binding                                                                                                                                                        | (24)         |
| Ddx4 = Mvh  | „Dead box polypeptide 4“ = „Mouse vasa homolog“: ATP-dependent RNA helicase; spermatogenesis is blocked in homozygous mutant mice, resulting in male infertility. Female mutant mice are fertile                                                                    | (22)         |
| Rhox5/Pem   | „Reproductive hox 5“: imprinted gene encoding putative transcription factor; thought to be involved in regulation of gametogenesis; targeted deletion causes male subfertility associated with increased germ-cell apoptosis and decreased sperm count and motility | (6, 10, 14)  |
| Hormad1     | „HORMA domain 1“: strongly expressed in testis; contains putative chromatin-binding domain; homologous to Hop1, a yeast meiosis-specific protein, as well as to asy1, a meiotic synaptic protein in <i>Arabidopsis thaliana</i>                                     | (2)          |
| Stk31       | „Serine threonine kinase 31“: poorly characterized; has been associated with female meiosis/germ cell development and spermatogenesis                                                                                                                               | (17)         |
| Tex19       | „Testis expressed gene 19“: expression restricted to germ cells and pluripotent cells; Tex19 knockout males exhibit impaired spermatogenesis                                                                                                                        | (11, 18)     |
| Aard        | „Alanine and arginine rich domain containing“: reported to show sexually dimorphic expression in fetal mouse gonads; specifically upregulated in Sertoli cells during                                                                                               | (21)         |

mouse testis differentiation

|          |                                                                                                                                                                                                                                     |         |
|----------|-------------------------------------------------------------------------------------------------------------------------------------------------------------------------------------------------------------------------------------|---------|
| Aurkc    | „Aurora kinase c“: single nucleotide deletion causes male infertility in humans owing to the production of abnormal sperm; knockout mice exhibit compromised fertility due to abnormal sperm                                        | (5, 9)  |
| Fthl17   | „Ferritin heavy polypeptide-like 17“: X-linked, spermatogonially-expressed, germ-cell-specific gene; located near chromosomal breakpoints in 2 azoospermic patients                                                                 | (13)    |
| Cytct    | „Cytochrome c testis“: testis-specific isoform of cytochrom c; sperm from Cytct-KO mice is less effective in fertilizing oocytes and contains large numbers of immotile spermatozoa; Cytct-KO mice exhibit early testicular atrophy | (16)    |
| Hook1    | Identical with „azh (abnormal spermatozoon head shape)“ gene: autosomal recessive mutation results in highly abnormal morphology of sperm heads and tails with resulting male infertility                                           | (15)    |
| Rhox6    | „Reproductive hox 6“: member of the recently identified X-linked homeobox gene cluster, which is composed of genes selectively expressed in reproductive tissues; see also Rhox5/Pem                                                | (8, 14) |
| Serpnb6c | „Serine protease inhibitor b6c“: member of the serpin family with sexually dimorphic expression in gonads                                                                                                                           | (1)     |

**REFERENCES FOR TABLE S2**

1. **Charron, Y., R. Madani, S. Nef, C. Combepine, J. Govin, S. Khochbin, and J. D. Vassalli.** 2006. Expression of serpinb6 serpins in germ and somatic cells of mouse gonads. *Mol Reprod Dev* **73**:9-19.
2. **Chen, Y. T., C. A. Venditti, G. Theiler, B. J. Stevenson, C. Iseli, A. O. Gure, C. V. Jongeneel, L. J. Old, and A. J. Simpson.** 2005. Identification of CT46/HORMAD1, an immunogenic cancer/testis antigen encoding a putative meiosis-related protein. *Cancer Immun* **5**:9.
3. **Choi, Y., D. Yuan, and A. Rajkovic.** 2008. Germ cell-specific transcriptional regulator sohlh2 is essential for early mouse folliculogenesis and oocyte-specific gene expression. *Biol Reprod* **79**:1176-82.
4. **Costa, Y., R. Speed, R. Ollinger, M. Alsheimer, C. A. Semple, P. Gautier, K. Maratou, I. Novak, C. Hoog, R. Benavente, and H. J. Cooke.** 2005. Two novel proteins recruited by synaptonemal complex protein 1 (SYCP1) are at the centre of meiosis. *J Cell Sci* **118**:2755-62.
5. **Dieterich, K., R. Soto Rifo, A. K. Faure, S. Hennebicq, B. Ben Amar, M. Zahi, J. Perrin, D. Martinez, B. Sele, P. S. Jouk, T. Ohlmann, S.**

- Rousseaux, J. Lunardi, and P. F. Ray.** 2007. Homozygous mutation of AURKC yields large-headed polyploid spermatozoa and causes male infertility. *Nat Genet* **39**:661-5.
6. **Eakin, G. S., and A. K. Hadjantonakis.** 2006. Sex-specific gene expression in preimplantation mouse embryos. *Genome Biol* **7**:205.
  7. **Hao, J., M. Yamamoto, T. E. Richardson, K. M. Chapman, B. S. Denard, R. E. Hammer, G. Q. Zhao, and F. K. Hamra.** 2008. *Sohlh2* knockout mice are male-sterile because of degeneration of differentiating type A spermatogonia. *Stem Cells* **26**:1587-97.
  8. **Hogeveen, K. N., and P. Sassone-Corsi.** 2005. Homeobox galore: when reproduction goes RHOX and roll. *Cell* **120**:287-8.
  9. **Kimmins, S., C. Crosio, N. Kotaja, J. Hirayama, L. Monaco, C. Hoog, M. van Duin, J. A. Gossen, and P. Sassone-Corsi.** 2007. Differential functions of the Aurora-B and Aurora-C kinases in mammalian spermatogenesis. *Mol Endocrinol* **21**:726-39.
  10. **Kobayashi, S., A. Isotani, N. Mise, M. Yamamoto, Y. Fujihara, K. Kaseda, T. Nakanishi, M. Ikawa, H. Hamada, K. Abe, and M. Okabe.** 2006. Comparison of gene expression in male and female mouse blastocysts revealed imprinting of the X-linked gene, *Rhox5/Pem*, at preimplantation stages. *Curr Biol* **16**:166-72.
  11. **Kuntz, S., E. Kieffer, L. Bianchetti, N. Lamoureux, G. Fuhrmann, and S. Viville.** 2008. *Tex19*, a mammalian-specific protein with a restricted expression in pluripotent stem cells and germ line. *Stem Cells* **26**:734-44.
  12. **Lee, K. H., S. Lee, B. Kim, S. Chang, S. W. Kim, J. S. Paick, and K. Rhee.** 2006. *Dazl* can bind to dynein motor complex and may play a role in transport of specific mRNAs. *Embo J* **25**:4263-70.
  13. **Lee, S., S. H. Lee, T. G. Chung, H. J. Kim, T. K. Yoon, I. P. Kwak, S. H. Park, W. T. Cha, S. W. Cho, and K. Y. Cha.** 2003. Molecular and cytogenetic characterization of two azoospermic patients with X-autosome translocation. *J Assist Reprod Genet* **20**:385-9.
  14. **Maclean, J. A., 2nd, M. A. Chen, C. M. Wayne, S. R. Bruce, M. Rao, M. L. Meistrich, C. Macleod, and M. F. Wilkinson.** 2005. *Rhox*: a new homeobox gene cluster. *Cell* **120**:369-82.
  15. **Mendoza-Lujambio, I., P. Burfeind, C. Dixkens, A. Meinhardt, S. Hoyer-Fender, W. Engel, and J. Neesen.** 2002. The *Hook1* gene is non-functional in the abnormal spermatozoon head shape (*azh*) mutant mouse. *Hum Mol Genet* **11**:1647-58.
  16. **Narisawa, S., N. B. Hecht, E. Goldberg, K. M. Boatright, J. C. Reed, and J. L. Millan.** 2002. Testis-specific cytochrome c-null mice produce functional sperm but undergo early testicular atrophy. *Mol Cell Biol* **22**:5554-62.
  17. **Olesen, C., P. Nyeng, M. Kalisz, T. H. Jensen, M. Moller, N. Tommerup, and A. G. Byskov.** 2007. Global gene expression analysis in fetal mouse ovaries with and without meiosis and comparison of selected genes with meiosis in the testis. *Cell Tissue Res* **328**:207-21.
  18. **Ollinger, R., A. J. Childs, H. M. Burgess, R. M. Speed, P. R. Lundegaard, N. Reynolds, N. K. Gray, H. J. Cooke, and I. R. Adams.** 2008. Deletion of the pluripotency-associated *Tex19.1* gene causes activation of endogenous retroviruses and defective spermatogenesis in mice. *PLoS Genet* **4**:e1000199.

19. **Ruggiu, M., R. Speed, M. Taggart, S. J. McKay, F. Kilanowski, P. Saunders, J. Dorin, and H. J. Cooke.** 1997. The mouse Dazla gene encodes a cytoplasmic protein essential for gametogenesis. *Nature* **389**:73-7.
20. **Soper, S. F., G. W. van der Heijden, T. C. Hardiman, M. Goodheart, S. L. Martin, P. de Boer, and A. Bortvin.** 2008. Mouse maelstrom, a component of nuage, is essential for spermatogenesis and transposon repression in meiosis. *Dev Cell* **15**:285-97.
21. **Svingen, T., A. Beverdam, P. Verma, D. Wilhelm, and P. Koopman.** 2007. Aard is specifically up-regulated in Sertoli cells during mouse testis differentiation. *Int J Dev Biol* **51**:255-8.
22. **Tanaka, S. S., Y. Toyooka, R. Akasu, Y. Katoh-Fukui, Y. Nakahara, R. Suzuki, M. Yokoyama, and T. Noce.** 2000. The mouse homolog of Drosophila Vasa is required for the development of male germ cells. *Genes Dev* **14**:841-53.
23. **Toyoda, S., T. Miyazaki, S. Miyazaki, T. Yoshimura, M. Yamamoto, F. Tashiro, E. Yamato, and J. I. Miyazaki.** 2008. Sohlh2 affects differentiation of KIT positive oocytes and spermatogonia. *Dev Biol*.
24. **Wolkowicz, M. J., L. Digilio, K. Klotz, J. Shetty, C. J. Flickinger, and J. C. Herr.** 2008. Equatorial segment protein (ESP) is a human alloantigen involved in sperm-egg binding and fusion. *J Androl* **29**:272-82.
25. **Zeng, M., W. Deng, X. Wang, W. Qiu, Y. Liu, H. Sun, D. Tao, S. Zhang, and Y. Ma.** 2008. DAZL binds to the transcripts of several Tssk genes in germ cells. *BMB Rep* **41**:300-4.
